# Supplementary material for: Normative Data for an Instrumental Assessment of the Upper-Limb Functionality
Source: Biomed Res Int. 2015 Oct 11;2015:484131. doi: 10.1155/2015/484131 (PMC4619839; doi:10.1155/2015/484131)
Supplement: Supplementary file 1 — Accuracy analysis.pdf: With the model used the pronation/supination angle and the displacement between the markers and the joint centres cannot be estimated. An analysis of the accuracies of the measure is provided in the file. HtMM.wmv: A healthy subject performing 5 Hand-to Mouth movements, one of the two investigated gestures. The movement is performed at self-selected speed. Usually the subjects is asked to perform 12 movements (the ten central ones are considered for analysis) RM.wmv: A healthy subject performing 5 Reaching movements, one of the two investigated gestures. The movement is performed at self-selected speed. Usually the subjects is asked to perform 12 movements (the ten central ones are considered for analysis) [file 484131.f1.zip]

Archive with 4 entries (3 files):
- mat.484131.v2/
- mat.484131.v2/Accuracy Analysis.pdf
- mat.484131.v2/HtMM.wmv
- mat.484131.v2/RM.wmv
